# Supplementary material
Source: PubMed Central journal article supplement (PMC187906)

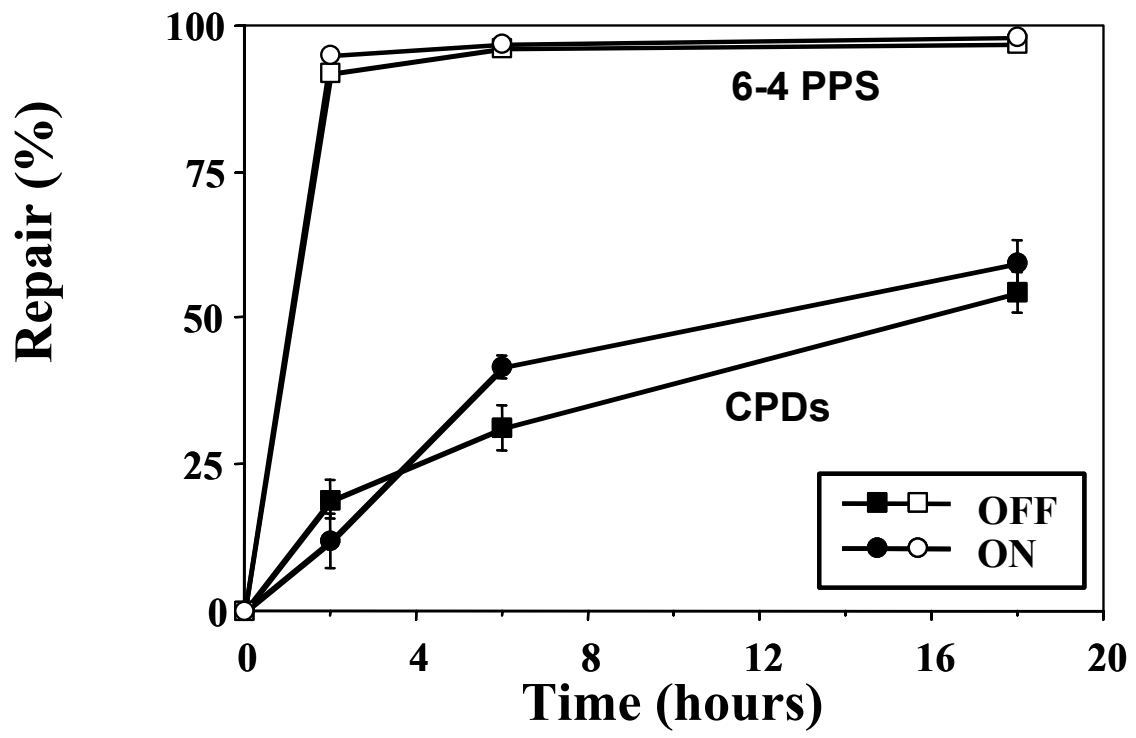

Supplement: pnas_100_17_9974__2.pdf [file pnas_100_17_9974__2.pdf]
